# Supplementary material
Source: ML conference proceedings conference paper supplement (https://openreview.net/forum?id=KRlJN9d1sW)
Supplement: supplementary_material [file attachment]

## A EXPERIMENTAL RESULTS

### A.1 EMPIRICAL RESULTS FOR PROPOSITION 5.1

We evaluated the performance of lazy-agents trained in environments with random delays, where  $o_{\max} = 10$ , and compared them to normal agents trained in those with constant delays, where  $o = o_{\max}$ , as illustrated in Fig. 5. The empirical results demonstrate that the performance of lazy-agents is comparable to that of normal agents. This supports our argument that RDMDPs can be transformed into equivalent CDMDPs through our lazy-agents, thereby enabling conventional methods designed for handling constant delays to be naturally extended to environments with random delays.

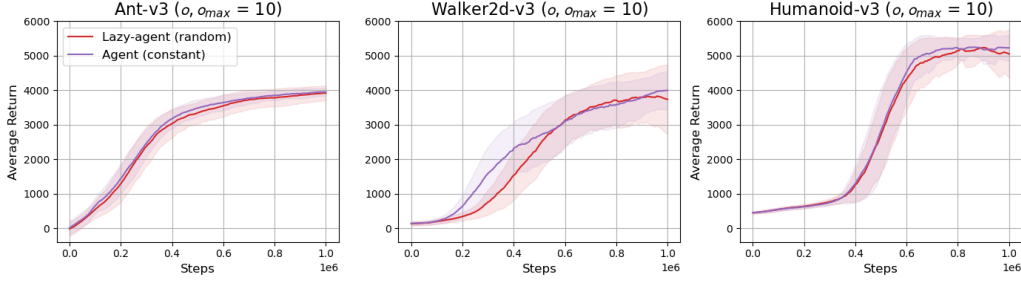

Figure 5: Performance curves of lazy-agents trained in environments with random delays of  $o_{\max} = 10$  and normal agents trained in environments with constant delays of  $o = o_{\max}$  for continuous control tasks in the MuJoCo benchmark. All tasks were conducted with five different seeds for one million time-steps. The shaded regions represent the standard deviation of average returns.

### A.2 PLOTS OF PERFORMANCE COMPARISON

In this section, we present the performance curves of each algorithm on the MuJoCo tasks with random delays of  $o_{\max} \in \{5, 10, 20\}$ . All tasks were conducted with five different seeds for one million time-steps. The shaded regions represent the standard deviation of average returns.

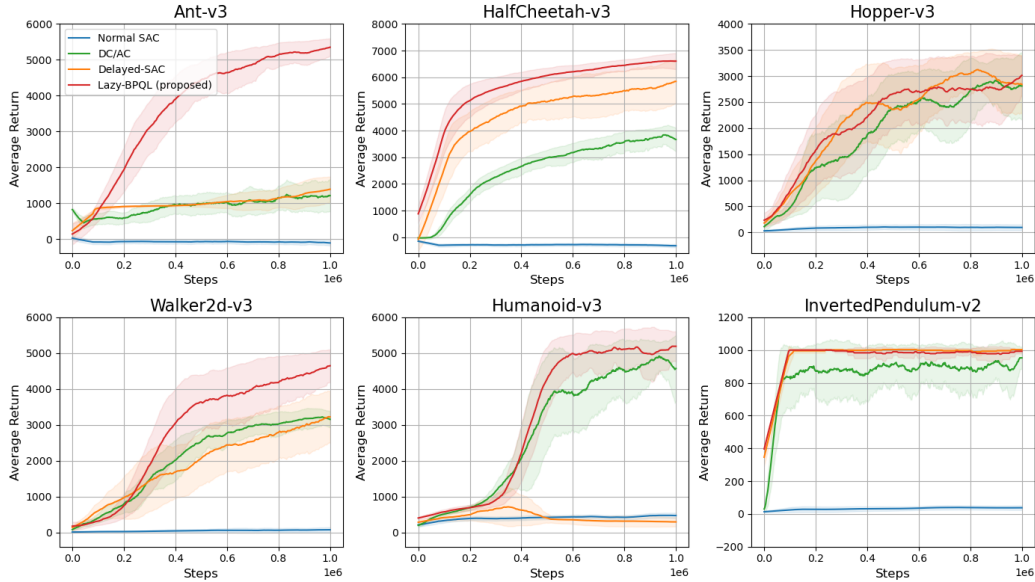

Figure 6: Performance curves of each algorithm on the MuJoCo tasks with  $o_{\max} = 5$ .

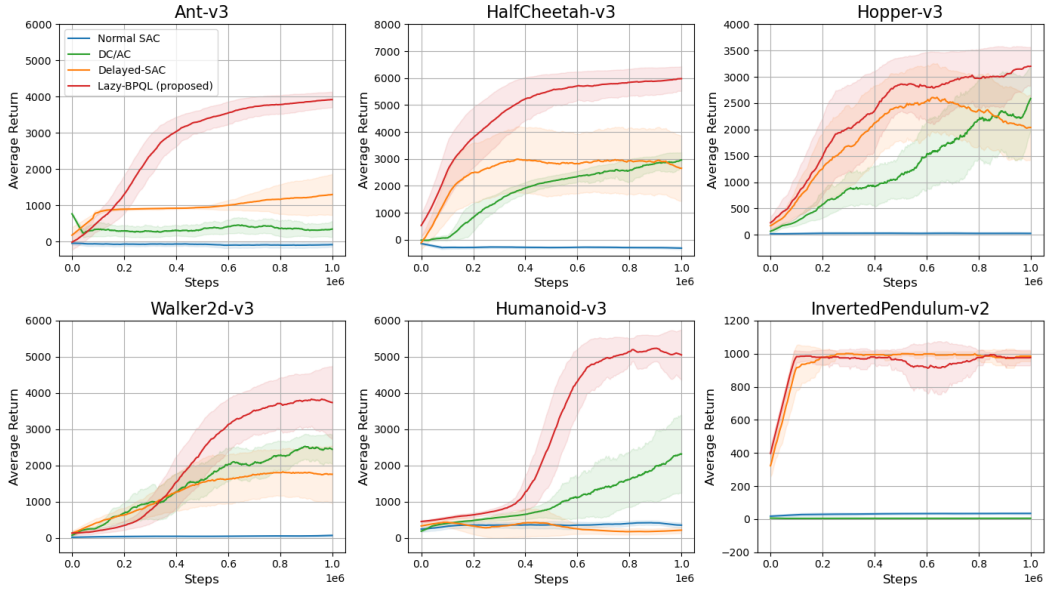Figure 7: Performance curves of each algorithm on the MuJoCo tasks with  $o_{\max} = 10$ .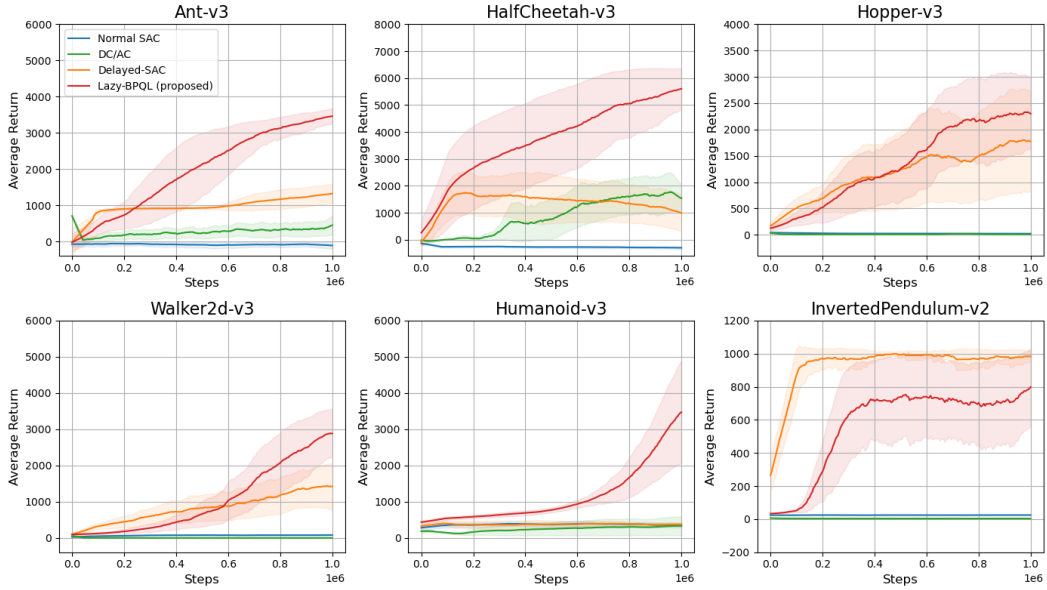Figure 8: Performance curves of each algorithm on the MuJoCo tasks with  $o_{\max} = 20$ .

### A.3 STATE-SPACE EXPLOSION ISSUE

In this section, we present the performance curves of lazy-augmented-SAC and lazy-BPQL on the MuJoCo tasks with random delays of  $o_{\max} \in \{5, 10, 20\}$ . As shown in Fig. 9, the proposed lazy-BPQL outperforms lazy-augmented-SAC in terms of asymptotic performance and sample efficiency. Notably, lazy-augmented-SAC completely fails to learn for the tasks even with the random delay of  $o_{\max} = 5$ , highlighting the importance of avoiding the state-space explosion issue.

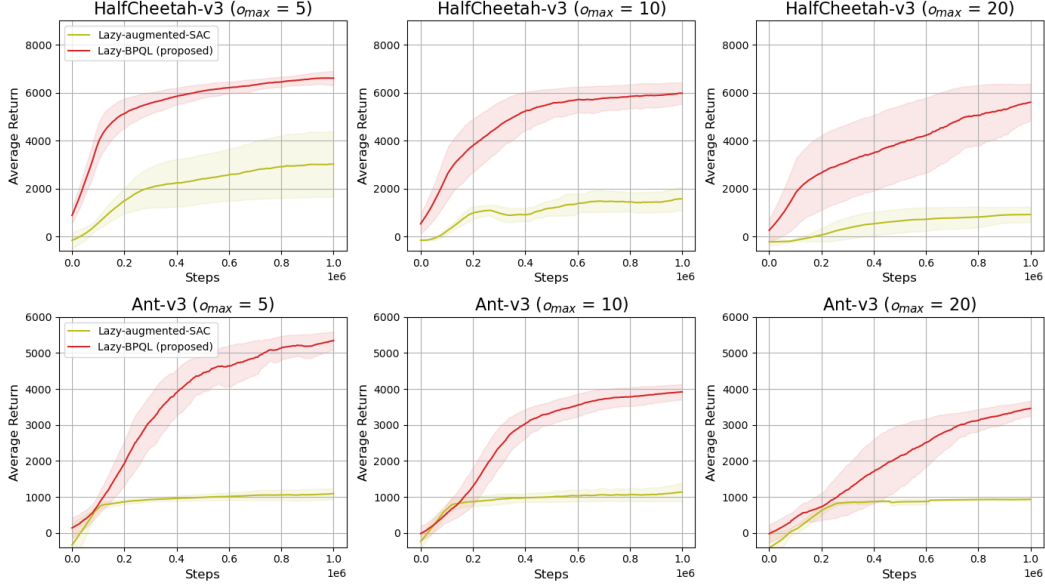

Figure 9: Performance curves of lazy-augmented-SAC and lazy-BPQL for continuous control tasks from the MuJoCo benchmark with random delays of  $o_{\max} = \{5, 10, 20\}$ . From the results, lazy-BPQL dominates lazy-augmented-SAC, underscoring the importance of avoiding the state-space explosion issue.

## B EXPERIMENTAL DETAILS

### B.1 ENVIRONMENTAL DETAILS

Table 2: Environmental details of the MuJoCo benchmark.

| Task                | State dimension | Action dimension | Time-step (s) |
|---------------------|-----------------|------------------|---------------|
| Ant-v3              | 27              | 8                | 0.05          |
| HalfCheetah-v3      | 17              | 6                | 0.05          |
| Walker2d-v3         | 17              | 6                | 0.008         |
| Hopper-v3           | 11              | 3                | 0.008         |
| Humanoid-v3         | 376             | 17               | 0.015         |
| InvertedPendulum-v2 | 4               | 1                | 0.04          |

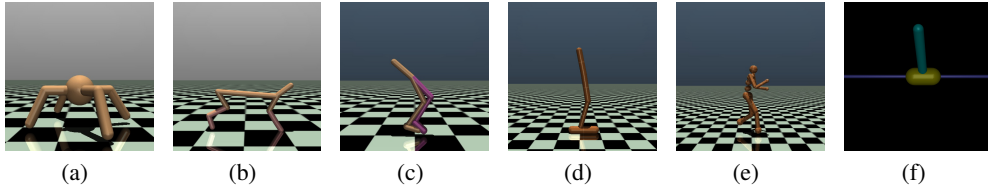

Figure 10: Experimental environments in the MuJoCo benchmark: (a) Ant-v3 (b) HalfCheetah-v3, (c) Walker2d-v3, (d) Hopper-v3, (e) Humanoid-v3, and (f) InvertedPendulum-v2

### B.2 IMPLEMENTATION DETAILS

The implementation details of the proposed lazy-BPQL align with those presented in Kim et al. (2023), with the specific hyperparameters listed in Table 3. Since the baseline algorithms included in our experiments employ the SAC algorithm as their foundational learning algorithm, the hyperparameters are consistent across all approaches, except for the DC/AC algorithm.

Table 3: Hyperparameters for lazy-BPQL and the baselines.

| Hyperparameters                        | Values               |
|----------------------------------------|----------------------|
| Actor network                          | 256, 256             |
| Critic network                         | 256, 256             |
| Learning rate (actor)                  | 3e-4                 |
| Learning rate (critic)                 | 3e-4                 |
| Temperature ( $\alpha$ )               | 0.2                  |
| Discount factor ( $\gamma$ )           | 0.99                 |
| Replay buffer size                     | 1e6                  |
| Mini-Batch size                        | 256                  |
| Target entropy                         | $-\dim \mathcal{A} $ |
| Target smoothing coefficient ( $\xi$ ) | 0.995                |
| Optimizer                              | Adam (Kingma, 2014)  |
| Total time-steps                       | 1e6                  |

### B.3 PSEUDO CODE OF LAZY-BPQL

The proposed lazy-agent can be seamlessly integrated into the BPQL framework with minimal modifications by *using* the initial state for decision-making at its maximum delayed times. Subsequently, all states become naturally available for use at their respective maximum delayed times.

In the implementation, a temporary buffer  $\mathcal{B}$  has been employed, as utilized by Kim et al. (2023), to store *observed* states, corresponding rewards, and action histories, which enables the agent to access timely and relevant information for constructing augmented states.

---

**Algorithm 1** Lazy Belief Projection-based  $Q$ -Learning (Lazy-BPQL)

---

```

1: Input: actor  $\bar{\pi}_\phi(a|\hat{x})$ , beta critic  $Q_{\theta,\beta}(s,a)$ , target beta critic  $Q_{\tilde{\theta},\beta}(s,a)$ , replay buffer  $\mathcal{D}$ , tem-
2:   porary buffer  $\mathcal{B}$ , maximum delay  $o_{\max}$ , beta critic learning rate  $\lambda_Q$ , actor learning rate  $\lambda_{\bar{\pi}}$ , soft
3:   update rate  $\xi$ , episodic length  $H$ , and total number of episodes  $E$ .
4: for episode  $e = 1$  to  $E$  do
5:   for time-step  $t = 1$  to  $H$  do
6:     if  $t < o_{\max}$  then
7:       select random or ‘no-ops’ action  $a_t$ 
8:       execute  $a_t$  on environment
9:       put  $a_t$ , observed states, rewards to  $\mathcal{B}$ 
10:    else if  $t = o_{\max}$  then ▷ wait for  $o_{\max}$  time-steps
11:      select random or ‘no-ops’ action  $a_t$ 
12:      execute  $a_t$  on environment
13:      put  $a_t$ , observed states, rewards to  $\mathcal{B}$ 
14:    else
15:      get  $s_{t-o_{\max}}, a_{t-o_{\max}}, \dots, a_{t-1}$  from  $\mathcal{B}$ 
16:      ▷ get most recent usable state and action histories
17:       $\hat{x}_t \leftarrow (s_{t-o_{\max}}, a_{t-o_{\max}}, \dots, a_{t-1})$  ▷ construct augmented state
18:       $a_t \leftarrow \bar{\pi}_\phi(\hat{x}_t)$ 
19:      execute  $a_t$  on environment
20:      put  $a_t$ , observed states, rewards to  $\mathcal{B}$ 
21:      if  $t > 2o_{\max}$  then
22:        get  $s_{t-2o_{\max}}, s_{t-2o_{\max}+1}, s_{t-o_{\max}}, r_{t-o_{\max}}, a_{t-2o_{\max}}, \dots, a_{t-o_{\max}}$  from  $\mathcal{B}$ 
23:         $\hat{x}_{t-o_{\max}} \leftarrow (s_{t-2o_{\max}}, a_{t-2o_{\max}}, \dots, a_{t-o_{\max}})$ 
24:         $\hat{x}_{t-o_{\max}+1} \leftarrow (s_{t-2o_{\max}+1}, a_{t-2o_{\max}+1}, \dots, a_{t-o_{\max}+1})$ 
25:        store  $(\hat{x}_{t-o_{\max}}, s_{t-o_{\max}}, a_{t-o_{\max}}, r_{t-o_{\max}}, \hat{x}_{t-o_{\max}+1}, s_{t-o_{\max}+1})$  in  $\mathcal{D}$ 
26:        pop  $s_{t-2o_{\max}}, a_{t-2o_{\max}}$  from  $\mathcal{B}$ 
27:      end if
28:    end if
29:  end for
30:  for each gradient step do
31:     $\theta \leftarrow \theta - \lambda_Q \nabla \mathcal{J}_{Q_\beta}(\theta)$  ▷ update beta critic
32:     $\phi \leftarrow \phi - \lambda_{\bar{\pi}} \nabla \mathcal{J}_{\bar{\pi}}(\phi)$  ▷ update actor
33:     $\tilde{\theta} \leftarrow \xi \theta + (1 - \xi) \tilde{\theta}$  ▷ update target beta critic
34:  end for
35: Output: actor  $\bar{\pi}_\phi$ 

```

---

## C VISUAL REPRESENTATION OF LAZY-AGENT

In this section, we provide a visual representation of the proposed lazy-agent employed in RDMDPs, where the maximum delay is set to  $o_{\max} = 3$ .

$*s_a^b : a = \text{generated time}, b = \text{delay}$

| Times            | t = 1 | t = 2 | t = 3 | t = 4 | t = 5 | t = 6 | t = 7 | t = 8 | t = 9 | t = 10 |
|------------------|-------|-------|-------|-------|-------|-------|-------|-------|-------|--------|
| Generated states |       |       |       |       |       |       |       |       |       |        |
| Observed states  |       |       |       |       |       |       |       |       |       |        |
| Usable states    |       |       |       |       |       |       |       |       |       |        |
| Augmented states |       |       |       |       |       |       |       |       |       |        |
| Actions          |       |       |       |       |       |       |       |       |       |        |

(a) Time  $t = 0$ 

$*s_a^b : a = \text{generated time}, b = \text{delay}$

| Times            | t = 1    | t = 2 | t = 3 | t = 4 | t = 5 | t = 6 | t = 7 | t = 8 | t = 9 | t = 10 |
|------------------|----------|-------|-------|-------|-------|-------|-------|-------|-------|--------|
| Generated states | $s_1^2$  |       |       |       |       |       |       |       |       |        |
| Observed states  |          |       |       |       |       |       |       |       |       |        |
| Usable states    |          |       |       |       |       |       |       |       |       |        |
| Augmented states | 'no-ops' |       |       |       |       |       |       |       |       |        |
| Actions          | $a_1$    |       |       |       |       |       |       |       |       |        |

(b) Time  $t = 1$ 

$*s_a^b : a = \text{generated time}, b = \text{delay}$

| Times            | t = 1   | t = 2    | t = 3 | t = 4 | t = 5 | t = 6 | t = 7 | t = 8 | t = 9 | t = 10 |
|------------------|---------|----------|-------|-------|-------|-------|-------|-------|-------|--------|
| Generated states | $s_1^2$ | $s_2^1$  |       |       |       |       |       |       |       |        |
| Observed states  |         |          |       |       |       |       |       |       |       |        |
| Usable states    |         |          |       |       |       |       |       |       |       |        |
| Augmented states |         | 'no-ops' |       |       |       |       |       |       |       |        |
| Actions          | $a_1$   | $a_2$    |       |       |       |       |       |       |       |        |

(c) Time  $t = 2$ 

Figure 11: At times 1 and 2, the states  $s_1^2$  and  $s_2^1$  are generated but remain unobserved by the lazy-agent due to delays. In this scenario, the lazy-agent does nothing ('no-ops') until the initial state  $s_1^2$  becomes usable.

\* $s_a^b$  :  $a$  = generated time,  $b$  = delay

| Times            | t = 1   | t = 2    | t = 3           | t = 4 | t = 5 | t = 6 | t = 7 | t = 8 | t = 9 | t = 10 |
|------------------|---------|----------|-----------------|-------|-------|-------|-------|-------|-------|--------|
| Generated states | $s_1^2$ | $s_2^1$  | $s_3^2$         |       |       |       |       |       |       |        |
| Observed states  |         |          | $s_1^2$ $s_2^1$ |       |       |       |       |       |       |        |
| Usable states    |         |          |                 |       |       |       |       |       |       |        |
| Augmented states |         | 'no-ops' |                 |       |       |       |       |       |       |        |
| Actions          | $a_1$   | $a_2$    | $a_3$           |       |       |       |       |       |       |        |

(a) Time  $t = 3$ 

\* $s_a^b$  :  $a$  = generated time,  $b$  = delay

| Times            | t = 1   | t = 2    | t = 3           | t = 4       | t = 5 | t = 6 | t = 7 | t = 8 | t = 9 | t = 10 |
|------------------|---------|----------|-----------------|-------------|-------|-------|-------|-------|-------|--------|
| Generated states | $s_1^2$ | $s_2^1$  | $s_3^2$         | $s_4^3$     |       |       |       |       |       |        |
| Observed states  |         |          | $s_1^2$ $s_2^1$ |             |       |       |       |       |       |        |
| Usable states    |         |          |                 | $s_1^2$     |       |       |       |       |       |        |
| Augmented states |         | 'no-ops' |                 | $\hat{x}_4$ |       |       |       |       |       |        |
| Actions          | $a_1$   | $a_2$    | $a_3$           | $a_4$       |       |       |       |       |       |        |

(b) Time  $t = 4$ 

\* $s_a^b$  :  $a$  = generated time,  $b$  = delay

| Times            | t = 1   | t = 2    | t = 3           | t = 4       | t = 5       | t = 6 | t = 7 | t = 8 | t = 9 | t = 10 |
|------------------|---------|----------|-----------------|-------------|-------------|-------|-------|-------|-------|--------|
| Generated states | $s_1^2$ | $s_2^1$  | $s_3^2$         | $s_4^3$     | $s_5^1$     |       |       |       |       |        |
| Observed states  |         |          | $s_1^2$ $s_2^1$ |             | $s_3^2$     |       |       |       |       |        |
| Usable states    |         |          |                 | $s_1^2$     | $s_2^1$     |       |       |       |       |        |
| Augmented states |         | 'no-ops' |                 | $\hat{x}_4$ | $\hat{x}_5$ |       |       |       |       |        |
| Actions          | $a_1$   | $a_2$    | $a_3$           | $a_4$       | $a_5$       |       |       |       |       |        |

(c) Time  $t = 5$ 

Figure 12: At time 3, states  $s_1^2$  and  $s_2^1$  are observed simultaneously. As the lazy-agent uses these observed states at their maximum delayed times,  $s_1^2$  is used at time 4 and  $s_2^1$  is used at time 5. These states are reformulated as augmented states before being fed into the policy, thereafter determining the appropriate actions. States  $s_3^2$ ,  $s_4^3$ , and  $s_5^1$  are generated at corresponding times, with  $s_3^2$  being observed at time 5.

\* $s_a^b$  :  $a$  = generated time,  $b$  = delay

| Times            | t = 1   | t = 2    | t = 3           | t = 4       | t = 5       | t = 6           | t = 7 | t = 8 | t = 9 | t = 10 |
|------------------|---------|----------|-----------------|-------------|-------------|-----------------|-------|-------|-------|--------|
| Generated states | $s_1^2$ | $s_2^1$  | $s_3^2$         | $s_4^3$     | $s_5^1$     | $s_6^0$         |       |       |       |        |
| Observed states  |         |          | $s_1^2$ $s_2^1$ |             | $s_3^2$     | $s_5^1$ $s_6^0$ |       |       |       |        |
| Usable states    |         |          |                 | $s_1^2$     | $s_2^1$     | $s_3^2$         |       |       |       |        |
| Augmented states |         | 'no-ops' |                 | $\hat{x}_4$ | $\hat{x}_5$ | $\hat{x}_6$     |       |       |       |        |
| Actions          | $a_1$   | $a_2$    | $a_3$           | $a_4$       | $a_5$       | $a_6$           |       |       |       |        |

(a) Time  $t = 6$ 

\* $s_a^b$  :  $a$  = generated time,  $b$  = delay

| Times            | t = 1   | t = 2    | t = 3           | t = 4       | t = 5       | t = 6           | t = 7       | t = 8 | t = 9 | t = 10 |
|------------------|---------|----------|-----------------|-------------|-------------|-----------------|-------------|-------|-------|--------|
| Generated states | $s_1^2$ | $s_2^1$  | $s_3^2$         | $s_4^3$     | $s_5^1$     | $s_6^0$         | $s_7^3$     |       |       |        |
| Observed states  |         |          | $s_1^2$ $s_2^1$ |             | $s_3^2$     | $s_5^1$ $s_6^0$ | $s_4^3$     |       |       |        |
| Usable states    |         |          |                 | $s_1^2$     | $s_2^1$     | $s_3^2$         | $s_4^3$     |       |       |        |
| Augmented states |         | 'no-ops' |                 | $\hat{x}_4$ | $\hat{x}_5$ | $\hat{x}_6$     | $\hat{x}_7$ |       |       |        |
| Actions          | $a_1$   | $a_2$    | $a_3$           | $a_4$       | $a_5$       | $a_6$           | $a_7$       |       |       |        |

(b) Time  $t = 7$ 

\* $s_a^b$  :  $a$  = generated time,  $b$  = delay

| Times            | t = 1   | t = 2    | t = 3           | t = 4       | t = 5       | t = 6           | t = 7       | t = 8       | t = 9 | t = 10 |
|------------------|---------|----------|-----------------|-------------|-------------|-----------------|-------------|-------------|-------|--------|
| Generated states | $s_1^2$ | $s_2^1$  | $s_3^2$         | $s_4^3$     | $s_5^1$     | $s_6^0$         | $s_7^3$     | ...         |       |        |
| Observed states  |         |          | $s_1^2$ $s_2^1$ |             | $s_3^2$     | $s_5^1$ $s_6^0$ | $s_4^3$     |             |       |        |
| Usable states    |         |          |                 | $s_1^2$     | $s_2^1$     | $s_3^2$         | $s_4^3$     | $s_5^1$     |       |        |
| Augmented states |         | 'no-ops' |                 | $\hat{x}_4$ | $\hat{x}_5$ | $\hat{x}_6$     | $\hat{x}_7$ | $\hat{x}_8$ |       |        |
| Actions          | $a_1$   | $a_2$    | $a_3$           | $a_4$       | $a_5$       | $a_6$           | $a_7$       | $a_8$       |       |        |

(c) Time  $t = 8$ 

Figure 13: States  $s_6^0$  and  $s_7^3$  are generated at respective times. At time 6, states  $s_5^1$  and  $s_6^0$  are observed simultaneously but are not immediately usable because the previously generated states,  $s_3^2$  and  $s_4^3$ , have not yet been used in decision-making processes. Instead,  $s_3^2$  is used at this time. At time 7, state  $s_4^3$  is observed and is available for use immediately. At time 8, state  $s_5^1$  becomes usable, as all previously generated states have now been both observed and used.

\* $s_a^b$  :  $a$  = generated time,  $b$  = delay

| Times            | t = 1   | t = 2    | t = 3           | t = 4       | t = 5       | t = 6           | t = 7       | t = 8       | t = 9       | t = 10 |
|------------------|---------|----------|-----------------|-------------|-------------|-----------------|-------------|-------------|-------------|--------|
| Generated states | $s_1^2$ | $s_2^1$  | $s_3^2$         | $s_4^3$     | $s_5^1$     | $s_6^0$         | $s_7^3$     | ...         | ...         |        |
| Observed states  |         |          | $s_1^2$ $s_2^1$ |             | $s_3^2$     | $s_5^1$ $s_6^0$ | $s_4^3$     |             |             |        |
| Usable states    |         |          |                 | $s_1^2$     | $s_2^1$     | $s_3^2$         | $s_4^3$     | $s_5^1$     | $s_6^0$     |        |
| Augmented states |         | 'no-ops' |                 | $\hat{x}_4$ | $\hat{x}_5$ | $\hat{x}_6$     | $\hat{x}_7$ | $\hat{x}_8$ | $\hat{x}_9$ |        |
| Actions          | $a_1$   | $a_2$    | $a_3$           | $a_4$       | $a_5$       | $a_6$           | $a_7$       | $a_8$       | $a_9$       |        |

(a) Time  $t = 9$ 

\* $s_a^b$  :  $a$  = generated time,  $b$  = delay

| Times            | t = 1   | t = 2    | t = 3           | t = 4       | t = 5       | t = 6           | t = 7       | t = 8       | t = 9       | t = 10         |
|------------------|---------|----------|-----------------|-------------|-------------|-----------------|-------------|-------------|-------------|----------------|
| Generated states | $s_1^2$ | $s_2^1$  | $s_3^2$         | $s_4^3$     | $s_5^1$     | $s_6^0$         | $s_7^3$     | ...         | ...         | ...            |
| Observed states  |         |          | $s_1^2$ $s_2^1$ |             | $s_3^2$     | $s_5^1$ $s_6^0$ | $s_4^3$     |             |             | $s_7^3$        |
| Usable states    |         |          |                 | $s_1^2$     | $s_2^1$     | $s_3^2$         | $s_4^3$     | $s_5^1$     | $s_6^0$     | $s_7^3$        |
| Augmented states |         | 'no-ops' |                 | $\hat{x}_4$ | $\hat{x}_5$ | $\hat{x}_6$     | $\hat{x}_7$ | $\hat{x}_8$ | $\hat{x}_9$ | $\hat{x}_{10}$ |
| Actions          | $a_1$   | $a_2$    | $a_3$           | $a_4$       | $a_5$       | $a_6$           | $a_7$       | $a_8$       | $a_9$       | $a_{10}$       |

(b) Time  $t = 10$ 

Figure 14: At times 9 and 10, states  $s_6^0$  and  $s_7^3$  are used in sequence. Despite the state observations occurring simultaneously or being out of order, all the delayed states are consistently used in sequence at their maximum delayed times, i.e.,  $\tau(s_n^{o_n}) = n + o_{\max}, \forall n > 0$ .
